# Supplementary material for: Self-assembled monolayer of poly( o -phenylenediamine)/silver core–shell hybrid-based enzyme-free impedimetric glucose sensor for blood samples
Source: Royal Society of Chemistry journal article supplement (doi:10.1039/d4ra04766d), 2024-01-01
Supplement: d4ra04766d1.pdf [file d4ra04766d1.pdf]

## Self-assembled monolayer of poly(o-phenylenediamine)/silver core-shell hybrid based enzyme-free impedimetric glucose sensor for blood sample

Mukul Deo<sup>a</sup>, Devleena Sahoo<sup>a</sup>, Pradip Kar<sup>a</sup>

<sup>a</sup>Department of Chemistry, Birla Institute of Technology, Mesra, Ranchi-835215, Jharkhand, India

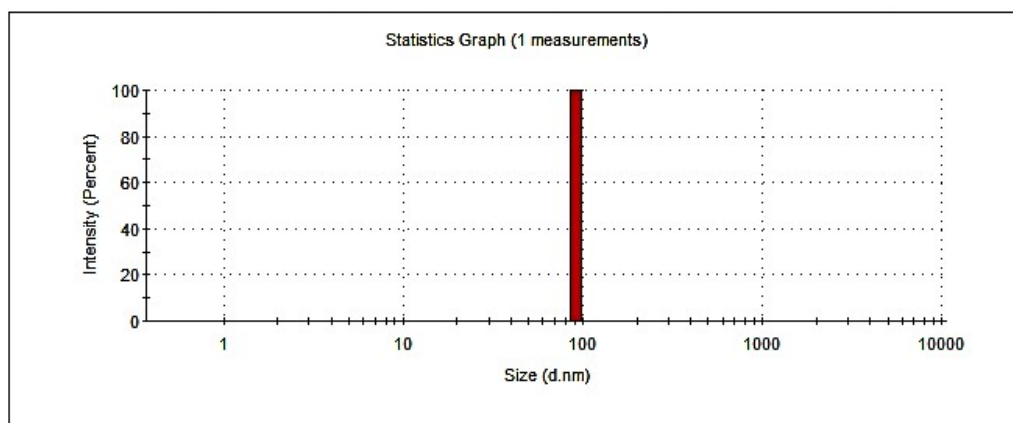

Fig S1. Size distribution of Ag nanoparticles within PoPD matrix.

Table S1. Anodic peak current ( $I_{pa}$ ), cathodic peak current ( $I_{pc}$ ), Anodic peak potential ( $E_{pa}$ ), cathodic peak potential ( $E_{pc}$ ) and potential difference ( $\Delta E$ ) for the CV responses of glucose analyte

| Sl. no. | Specification                                                             | $I_{pa}$ ( $\mu A$ ) | $I_{pc}$ ( $\mu A$ ) | $E_{pa}$ (V) | $E_{pc}$ (V) | $\Delta E = E_{pa} - E_{pc}$ (mV) |
|---------|---------------------------------------------------------------------------|----------------------|----------------------|--------------|--------------|-----------------------------------|
| 01      | Clean GCE                                                                 | 7.859                | 7.565                | 0.310        | 0.217        | 93                                |
| 02      | PoPD/Ag hybrid modified GCE                                               | 5.780                | 5.327                | 0.386        | 0.150        | 239                               |
| 03      | PoPD/Ag hybrid modified GCE towards 10 $\mu L$ of 72 mg $dL^{-1}$ glucose | 5.715                | 5.546                | 0.384        | 0.151        | 233                               |
| 04      | PoPD/Ag hybrid modified GCE towards 20 $\mu L$ of 72 mg $dL^{-1}$ glucose | 5.518                | 5.081                | 0.415        | 0.115        | 300                               |
| 05      | PoPD/Ag hybrid modified GCE towards 30 $\mu L$ of 72 mg $dL^{-1}$ glucose | 5.229                | 5.071                | 0.426        | 0.097        | 329                               |
| 06      | PoPD/Ag hybrid modified GCE towards 40 $\mu L$ of 72 mg $dL^{-1}$ glucose | 5.290                | 4.885                | 0.435        | 0.088        | 352                               |
| 07      | PoPD/Ag hybrid modified GCE towards 50 $\mu L$ of 72 mg $dL^{-1}$ glucose | 5.221                | 4.899                | 0.437        | 0.087        | 351                               |

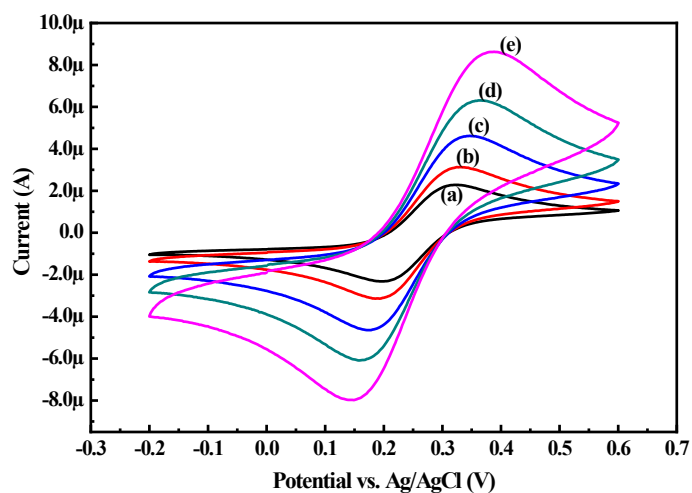

Fig. S2. Comparative CV of PoPD/Ag modified GCE towards 10  $\mu\text{L}$  of 72  $\text{mg dL}^{-1}$  glucose in 25 mL aqueous KCl (1 M) electrolytes containing  $10^{-3}$  M  $[\text{Fe}(\text{CN})_6]^{3-/4-}$  at scan rate (a) 5, (b) 10, (c) 25, (d) 50 and (e) 100  $\text{mV s}^{-1}$

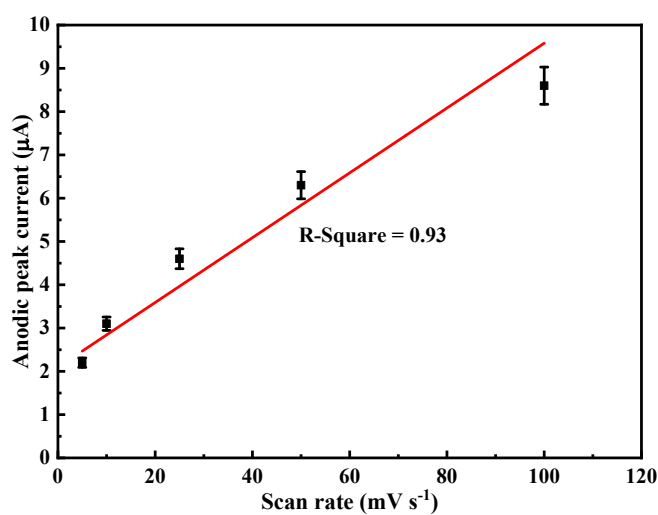

Fig. S3. Linear fitting plot of the anodic peak current against the scan rate

Table S2. Fitted  $R_{ct}$  values and different of  $R_{ct}$  in EIS measurements of glucose analyte

| Sl. No. | Specification                                                                          | $R_{ct}$ ( $\Omega$ ) | +/- ( $\Omega$ ) | different of $R_{ct}$ with blank ( $\Omega$ ) |
|---------|----------------------------------------------------------------------------------------|-----------------------|------------------|-----------------------------------------------|
| 01      | Clean GCE                                                                              | 1535                  | 5                |                                               |
| 02      | PoPD/Ag hybrid modified GCE                                                            | 15800                 | 100              | 0                                             |
| 03      | PoPD/Ag hybrid modified GCE towards 10 $\mu\text{L}$ of 72 $\text{mg dL}^{-1}$ glucose | 12325                 | 50               | -3475                                         |
| 04      | PoPD/Ag hybrid modified GCE towards 20 $\mu\text{L}$ of 72 $\text{mg dL}^{-1}$ glucose | 19720                 | 150              | 3920                                          |
| 05      | PoPD/Ag hybrid modified GCE towards 30 $\mu\text{L}$ of 72 $\text{mg dL}^{-1}$ glucose | 23105                 | 105              | 7305                                          |
| 06      | PoPD/Ag hybrid modified GCE towards 40 $\mu\text{L}$ of 72 $\text{mg dL}^{-1}$ glucose | 25610                 | 120              | 9810                                          |
| 07      | PoPD/Ag hybrid modified GCE towards 50 $\mu\text{L}$ of 72 $\text{mg dL}^{-1}$ glucose | 27630                 | 250              | 11830                                         |

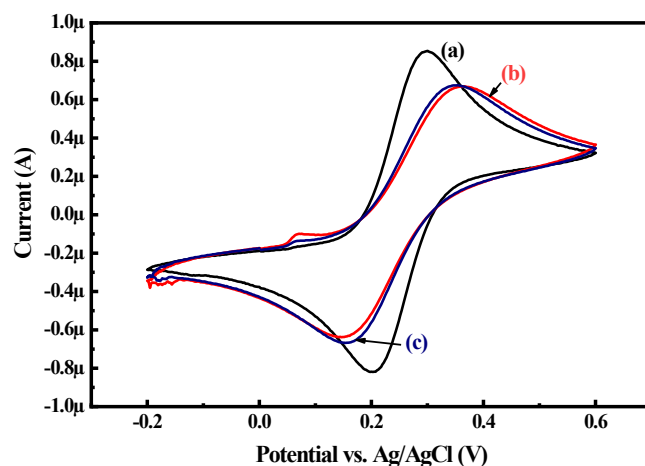

Fig. S4. CV responses of (a) GCE, (b) PoPD modified GCE and (c) PoPD modified GCE towards 10  $\mu\text{L}$  of 72  $\text{mg dL}^{-1}$  aqueous glucose at scan rate  $50 \text{ mV s}^{-1}$  in 25 mL aqueous KCl (1 M) electrolytes containing  $10^{-3} \text{ M}$   $[\text{Fe}(\text{CN})_6]^{3-/4-}$  redox couple

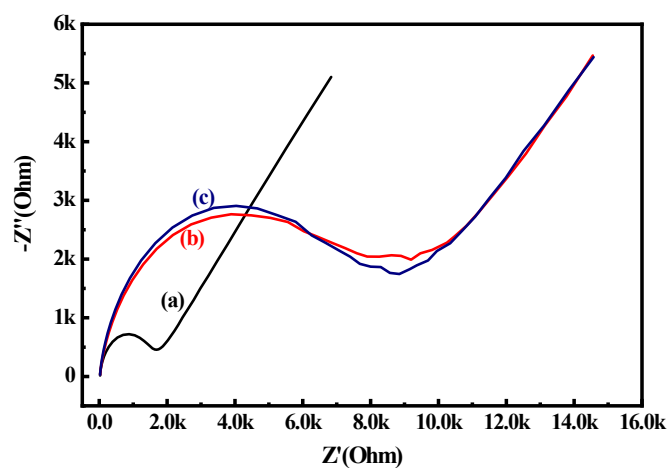

Fig. S5. EIS responses of (a) GCE, (b) PoPD modified GCE and (c) PoPD modified GCE towards 10  $\mu\text{L}$  of 72  $\text{mg dL}^{-1}$  aqueous glucose in 25 mL aqueous KCl (1 M) electrolytes containing  $10^{-3} \text{ M}$   $[\text{Fe}(\text{CN})_6]^{3-/4-}$  redox couple

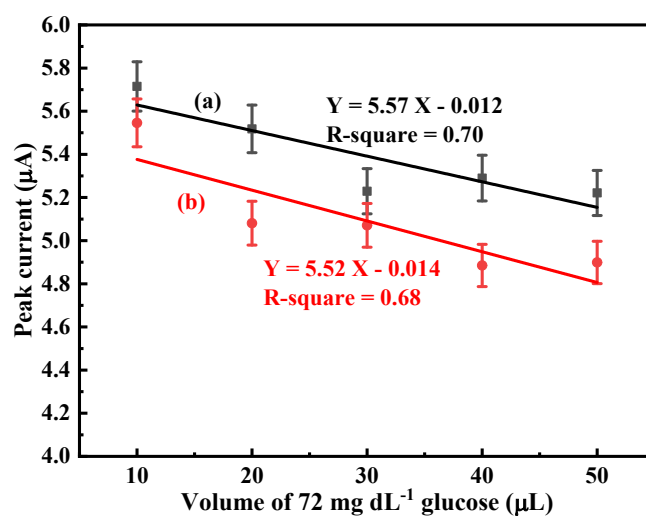

Fig. S6. Linear fitting plot of (a) anodic and (b) cathodic peak current against the volume of glucose

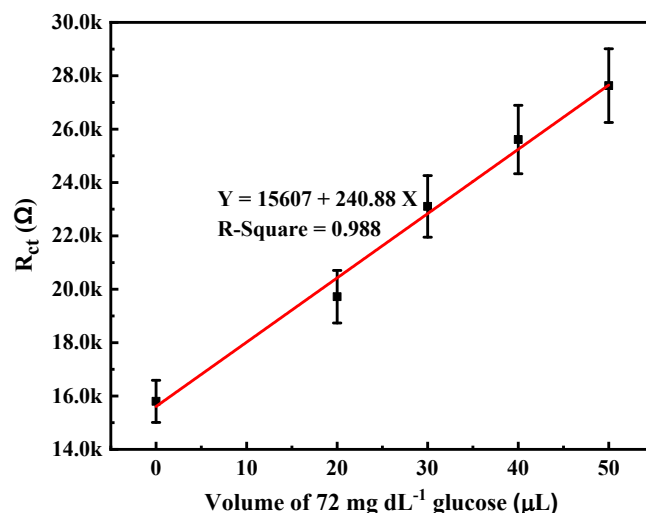

Fig. S7. Linear fitting plot of charge transfer resistance ( $R_{ct}$ ) value against the volume of glucose

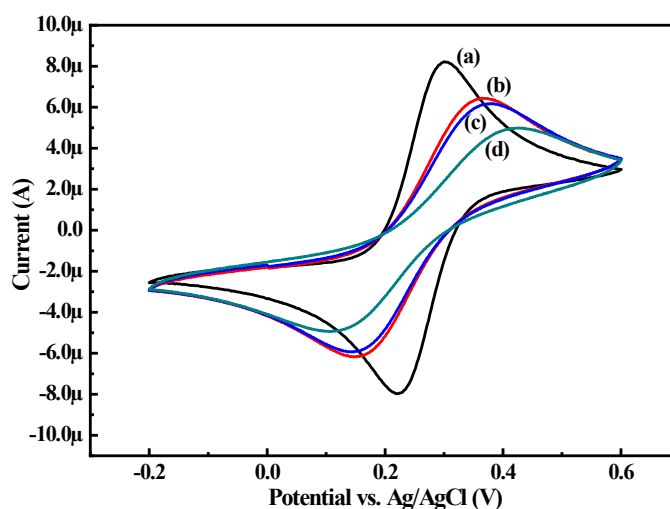

Fig. S8. CV responses of (a) GCE, (b) PoPD/Ag hybrid modified GCE and PoPD/Ag hybrid modified GCE towards (c) 10  $\mu\text{L}$ , (d) 50  $\mu\text{L}$  blood sample in 25 mL aqueous KCl (1 M) electrolytes containing  $10^{-3}$  M  $[\text{Fe}(\text{CN})_6]^{3-/4-}$ -redox couple

Table S3. Anodic peak current ( $I_{pa}$ ), cathodic peak current ( $I_{pc}$ ), Anodic peak potential ( $E_{pa}$ ), cathodic peak potential ( $E_{pc}$ ) and potential difference ( $\Delta E$ ) for the CV responses of blood sample

| Sl. no. | Specification                                                 | $I_{pa}$ ( $\mu\text{A}$ ) | $I_{pc}$ ( $\mu\text{A}$ ) | $E_{pa}$ (V) | $E_{pc}$ (V) | $\Delta E = E_{pa} - E_{pc}$ (mV) |
|---------|---------------------------------------------------------------|----------------------------|----------------------------|--------------|--------------|-----------------------------------|
| 01      | Clean GCE                                                     | 8.213                      | 7.971                      | 0.301        | 0.221        | 80                                |
| 02      | PoPD/Ag hybrid modified GCE                                   | 6.422                      | 6.171                      | 0.365        | 0.151        | 214                               |
| 03      | PoPD/Ag hybrid modified GCE towards 10 $\mu\text{L}$ of blood | 6.157                      | 5.926                      | 0.377        | 0.147        | 230                               |
| 04      | PoPD/Ag hybrid modified GCE towards 50 $\mu\text{L}$ of blood | 4.971                      | 4.933                      | 0.424        | 0.111        | 313                               |

Table S4. Fitted  $R_{ct}$  values and different of  $R_{ct}$  in EIS measurements of blood sample

| Sl. No. | Specification                                                 | Electrode modification                | $R_{ct}$ ( $\Omega$ ) | +/- ( $\Omega$ ) |
|---------|---------------------------------------------------------------|---------------------------------------|-----------------------|------------------|
| 01      | Clean GCE                                                     | Clean electrode                       | 730                   | 5                |
| 02      | PoPD/Ag hybrid modified GCE                                   | blank                                 | 10452                 | 220              |
| 03      | PoPD/Ag hybrid modified GCE towards 10 $\mu\text{L}$ of blood | 10 $\mu\text{L}$ of 100mg human blood | 13379                 | 136              |
| 04      | PoPD/Ag hybrid modified GCE towards 50 $\mu\text{L}$ of blood | 50 $\mu\text{L}$ of 100mg human blood | 26685                 | 250              |
